# Supplementary material for: Serotonin is the main tryptophan metabolite associated with psychiatric comorbidity in abstinent cocaine-addicted patients
Source: PubMed Central journal article supplement (PMC6856167; doi:10.1038/s41598-019-53312-0), 2019-11-14
Supplement: 41598_2019_53312_MOESM1_ESM.pdf [file 41598_2019_53312_MOESM1_ESM.pdf]

**Serotonin is the main tryptophan metabolite associated with psychiatric comorbidity in abstinent cocaine-addicted patients**

Pedro Araos<sup>1,2§</sup>, Rebeca Vidal<sup>3§</sup>, Esther O'Shea<sup>3</sup>, María Pedraz<sup>1</sup>, Nuria García-Marchena<sup>1</sup>, Antonia Serrano<sup>1</sup>, Juan Suárez<sup>1</sup>, Estela Castilla-Ortega<sup>1,2</sup>, Juan Jesús Ruiz<sup>4</sup>, Rafael Campos-Cloute<sup>4</sup>, Luis J. Santín<sup>2</sup>, Fernando Rodríguez de Fonseca<sup>1</sup>, Francisco Javier Pavón<sup>\*1</sup>, María Isabel Colado<sup>\*3</sup>

## SUPPLEMENTARY FIGURES

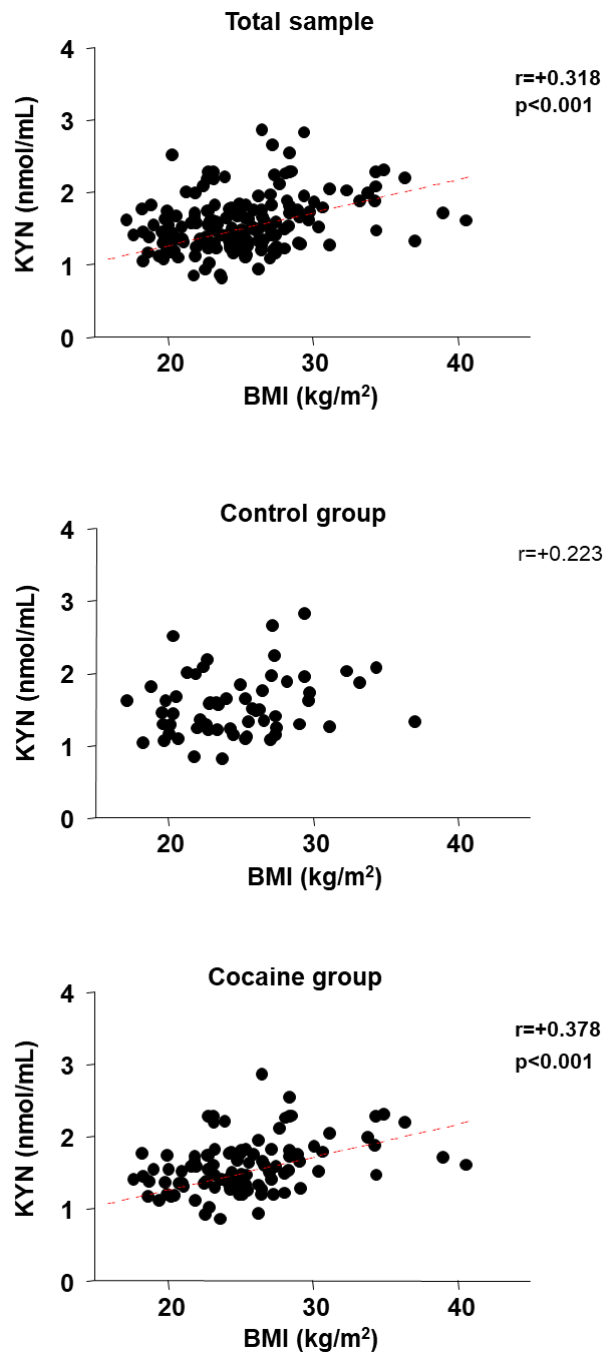

**Figure S1.** Correlation analyses between plasma concentrations of KYN and BMI in abstinent CUD-patients and control subjects. Black dots are individual values. Pearson correlation coefficients ( $r$ ) were calculated for the total sample, the control group and the cocaine group.

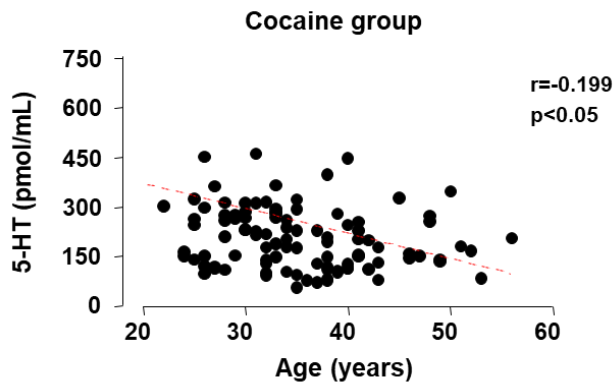

**Non-comorbid (mental disorders) subgroup**

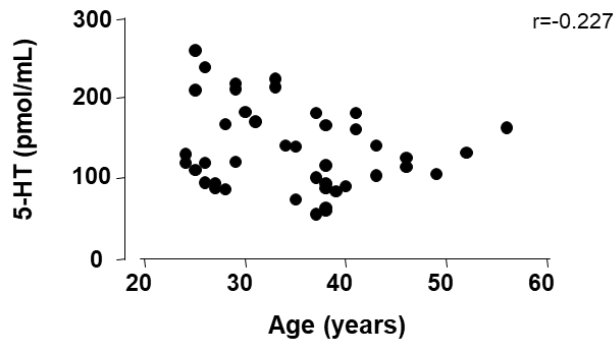

**Comorbid (mental disorders) subgroup**

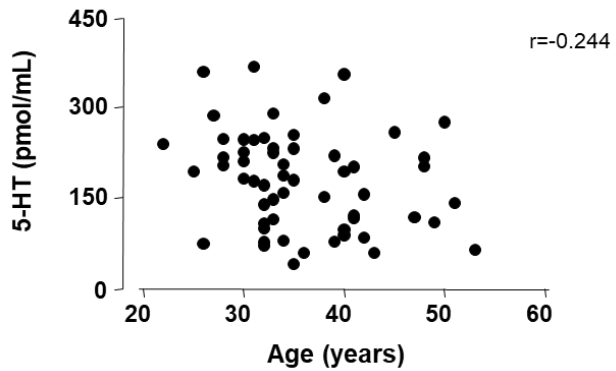

**Figure S2.** Correlation analyses between plasma concentrations of 5-HT and age in abstinent CUD-patients according to diagnosis of comorbid mental disorders. Black dots are individual values. Pearson correlation coefficients ( $r$ ) were calculated for the control group, the non-comorbid subgroup and the comorbid (mental disorders) subgroup.

**Table S1.** Biological and socio-demographic variables

| VARIABLE                              |                                                               | COCAINE GROUP<br>N=100                         | CONTROL GROUP<br>N=60                         | P-value             |
|---------------------------------------|---------------------------------------------------------------|------------------------------------------------|-----------------------------------------------|---------------------|
| <b>Age</b><br>[mean (SD)]             | years                                                         | 35.4 (7.5)                                     | 36.4 (10.4)                                   | ns <sup>a</sup>     |
| <b>Body mass index</b><br>[mean (SD)] | kg/m <sup>2</sup>                                             | 25.4 (4.4)                                     | 24.6 (4.3)                                    | ns <sup>a</sup>     |
| <b>Sex</b><br>[N (%)]                 | Female<br>Male                                                | 18 (18.0)<br>82 (82.0)                         | 30 (50.0)<br>30 (50.0)                        | <0.001 <sup>b</sup> |
| <b>Marital status</b><br>[N (%)]      | Single<br>Married/cohabiting<br>Divorced/separated<br>Widowed | 40 (40.0)<br>37 (37.0)<br>23 (23.0)<br>0 (0.0) | 29 (48.3)<br>25 (41.7)<br>6 (10.0)<br>0 (0.0) | ns <sup>b</sup>     |
| <b>Education</b><br>[N (%)]           | ≤ Primary<br>Secondary<br>Higher                              | 57 (57.0)<br>32 (32.0)<br>11 (11.0)            | 5 (8.3)<br>25 (41.7)<br>30 (50.0)             | <0.001 <sup>b</sup> |
| <b>Occupation</b><br>[N (%)]          | Student<br>Employed<br>Unemployed<br>Retired                  | 0 (0.0)<br>41 (41.0)<br>58 (58.0)<br>1 (1.0)   | 4 (6.7)<br>52 (86.7)<br>4 (6.7)<br>0 (0.0)    | <0.001 <sup>b</sup> |

(<sup>a</sup>) P-value from Student's t-test.

(<sup>b</sup>) P-value from Fisher's exact test or Chi-square test.

Abbreviations: ns, non-significant

**Table S2.** Ratios of metabolites related to TRP of participants.

| RATIO           |                 | COCAINE GROUP                                                              | CONTROL GROUP                                                              | P-value <sup>a</sup> |
|-----------------|-----------------|----------------------------------------------------------------------------|----------------------------------------------------------------------------|----------------------|
| <b>KYN/TRP</b>  | mean<br>(95%CI) | $7.08 \times 10^{-2}$<br>( $5.92 \times 10^{-2}$ - $8.47 \times 10^{-2}$ ) | $7.60 \times 10^{-2}$<br>( $6.22 \times 10^{-2}$ - $9.31 \times 10^{-2}$ ) | ns                   |
| <b>KA/KYN</b>   | mean<br>(95%CI) | $1.49 \times 10^{-2}$<br>( $1.36 \times 10^{-2}$ - $1.63 \times 10^{-2}$ ) | $1.73 \times 10^{-2}$<br>( $1.57 \times 10^{-2}$ - $1.91 \times 10^{-2}$ ) | <b>0.022</b>         |
| <b>QA/KYN</b>   | mean<br>(95%CI) | 11.02<br>(9.73-12.47)                                                      | 9.42<br>(8.47-10.50)                                                       | ns                   |
| <b>5-HT/TRP</b> | mean<br>(95%CI) | $2.39 \times 10^{-3}$<br>( $2.07 \times 10^{-3}$ - $2.81 \times 10^{-3}$ ) | $1.94 \times 10^{-3}$<br>( $1.70 \times 10^{-3}$ - $2.25 \times 10^{-3}$ ) | <b>0.046</b>         |

(<sup>a</sup>) P-values from ANCOVA (*F* statistics and degrees of freedom are indicated in the text).  
Abbreviations: ns, non-significant

**Table S3.** Ratios of metabolites related to TRP metabolism of abstinent CUD-patients according to comorbid mental disorders.

| RATIO           |                 | COMORBID MENTAL DISORDERS                                                   |                                                                            | P-value <sup>a</sup> |
|-----------------|-----------------|-----------------------------------------------------------------------------|----------------------------------------------------------------------------|----------------------|
|                 |                 | NON-COMORBID                                                                | COMORBID                                                                   |                      |
| <b>KYN/TRP</b>  | mean<br>(95%CI) | $8.89 \times 10^{-2}$<br>( $6.68 \times 10^{-2}$ - $11.83 \times 10^{-2}$ ) | $6.56 \times 10^{-2}$<br>( $5.24 \times 10^{-2}$ - $8.22 \times 10^{-2}$ ) | 0.063                |
| <b>KA/KYN</b>   | mean<br>(95%CI) | $1.52 \times 10^{-2}$<br>( $1.31 \times 10^{-2}$ - $1.76 \times 10^{-2}$ )  | $1.43 \times 10^{-2}$<br>( $1.27 \times 10^{-2}$ - $1.61 \times 10^{-2}$ ) | 0.772                |
| <b>QA/KYN</b>   | mean<br>(95%CI) | 10.67<br>(8.63-13.15)                                                       | 10.45<br>(8.77-12.46)                                                      | 0.855                |
| <b>5-HT/TRP</b> | mean<br>(95%CI) | $3.36 \times 10^{-3}$<br>( $2.47 \times 10^{-3}$ - $4.56 \times 10^{-3}$ )  | $3.06 \times 10^{-3}$<br>( $2.40 \times 10^{-3}$ - $3.88 \times 10^{-3}$ ) | 0.582                |

(<sup>a</sup>) P-values from ANCOVA (*F* statistics and degrees of freedom are indicated in the text).
